# Supplementary material for: The growth mechanism and ferroelectric domains of diisopropylammonium bromide films synthesized via 12-crown-4 addition at room temperature
Source: Royal Society of Chemistry journal article supplement (doi:10.1039/c6cp00568c), 2016-01-01
Supplement: c6cp00568c1.pdf [file c6cp00568c1.pdf]

Growth and ferroelectric domains of Diisopropylammonium Bromide films with 12-crown-4 addition at room temperature

Kaige Gao,<sup>a</sup> Cong Xu,<sup>a</sup> Zepeng Cui,<sup>a</sup> Chuang Liu,<sup>a</sup> Linsong Gao,<sup>a</sup> Chen Li,<sup>b</sup> Di Wu,<sup>b</sup> Hongling Cai<sup>a</sup> and Xiaoshan Wu<sup>a</sup>

<sup>a</sup>*Collaborative Innovation Center of Advanced Microstructures, Lab of Solid State Microstructures, School of Physics, Nanjing University, Nanjing 210093, P. R. China*

<sup>b</sup>*Department of Materials Science and Engineering, College of Engineering and Applied Sciences, Nanjing University, Nanjing 210093, China*

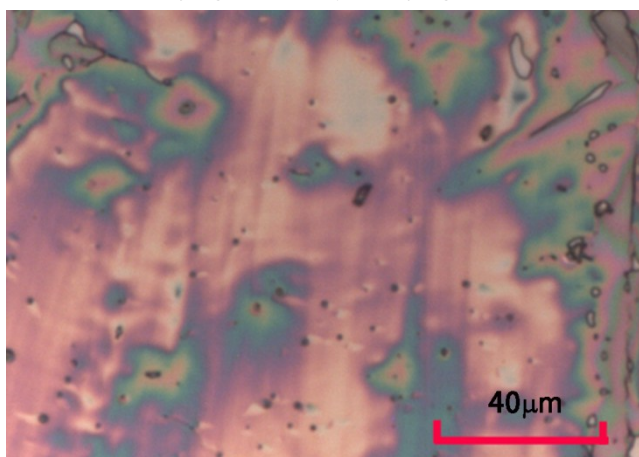

Fig. S1 Optical morphology of the P2<sub>1</sub>2<sub>1</sub>2<sub>1</sub> phase DIPAB films fabricated by spin-coating method at room temperature.

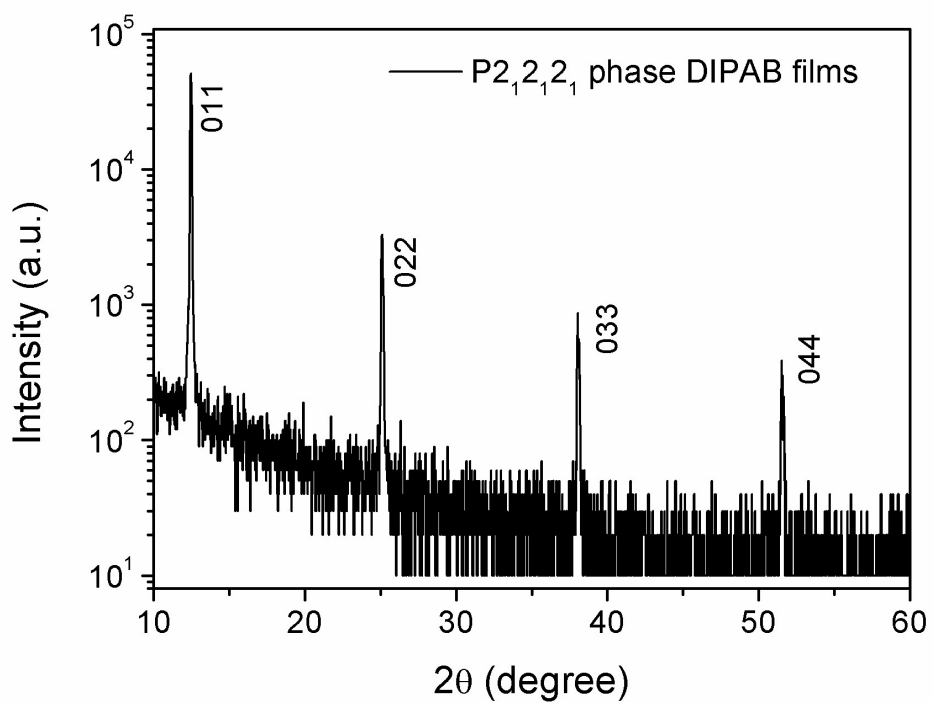

Fig. S2 XRD pattern of the P2<sub>1</sub>2<sub>1</sub>2<sub>1</sub> phase DIPAB films fabricated by spin-coating method at room temperature.

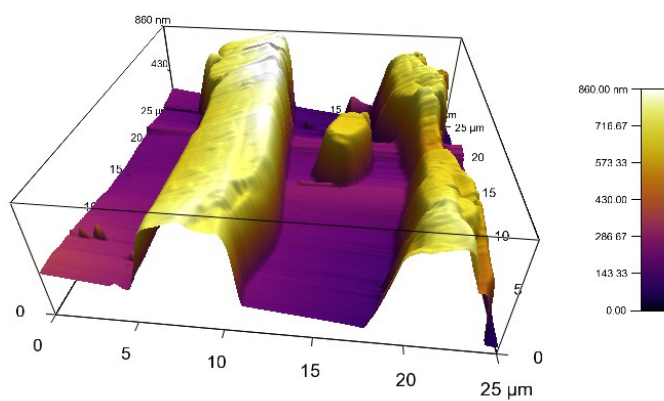

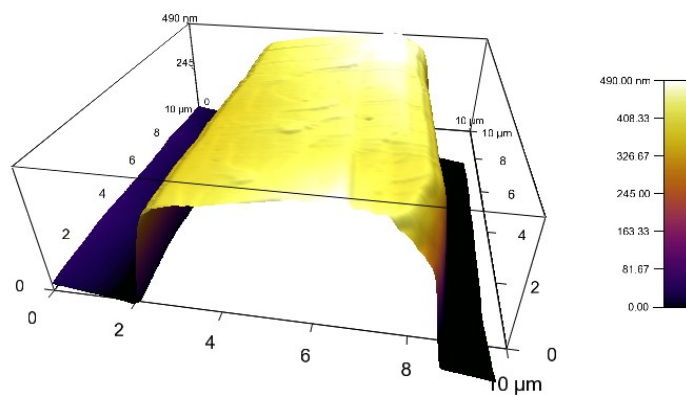

Fig. S3 Surface topography of the DIPAB thin films with a thickness of hundreds of nanometers on the Si substrates.

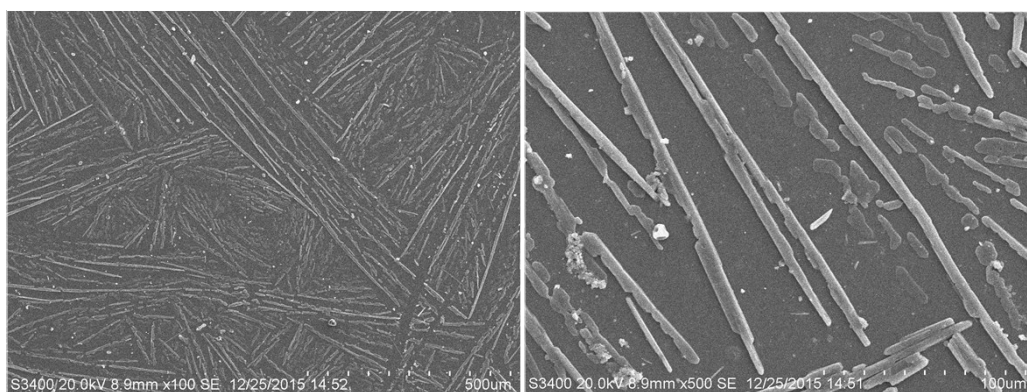

Fig. S4 SEM surface topography of the DIPAB thin films.
